# Supplementary material for: A multicenter analysis of treatment patterns and clinical outcomes of subsequent therapies after progression on palbociclib in HR+/HER2− metastatic breast cancer
Source: PubMed Central journal article supplement — Ther Adv Med Oncol. 2021 Jun 11;13:17588359211022890. doi: 10.1177/17588359211022890 (PMC8202336; doi:10.1177/17588359211022890), 2021-06-11
Supplement: sj-pdf-1-tam-10.1177_17588359211022890.pdf [file sj-pdf-1-tam-10.1177_17588359211022890.pdf]

Supplementary material

Supplementary Table 1. Objective response rate in all patients.

| Response            | n=198 (%) |
|---------------------|-----------|
| Best response       |           |
| Complete response   | 0 (0)     |
| Partial response    | 21 (10.6) |
| Stable disease      | 94 (47.5) |
| Progressive disease | 61 (30.8) |
| Not assessable      | 22 (11.2) |
| ORR                 | 21 (10.6) |

Abbreviations: ORR, objective response rate.

Supplementary Table 2. Objective response rate in the chemotherapy and endocrine therapy groups.

| Response            | Chemotherapy group<br>n = 146 (%) | Endocrine therapy group<br>n = 52 (%) |
|---------------------|-----------------------------------|---------------------------------------|
| Best response       |                                   |                                       |
| Complete response   | 0 (0)                             |                                       |
| Partial response    | 19 (13.0)                         | 2 (3.8)                               |
| Stable disease      | 74 (50.7)                         | 20 (38.5)                             |
| Progressive disease | 37 (25.3)                         | 24 (46.2)                             |
| Not assessable      | 16 (11.0)                         | 6 (11.5)                              |
| ORR                 | 19 (13.0)                         | 2 (3.8)                               |
| p value             | 0.114                             |                                       |

Abbreviations: ORR, objective response rate.

Supplementary Table 3. Univariate and multivariate Cox regression analysis of factors associated with progression-free survival in the chemotherapy group.

| Characteristic                                                             | HR (95%CI)          | Univariate<br>Cox analysis<br>p-value | HR (95%CI)          | Multivariate<br>Cox analysis<br>p-value |
|----------------------------------------------------------------------------|---------------------|---------------------------------------|---------------------|-----------------------------------------|
| Age group ( $\geq 60$ vs. $< 60$ )                                         | 0.793 (0.507-1.239) | 0.308                                 | 0.741 (0.445-1.236) | 0.251                                   |
| Menopausal status (postmenopausal vs. premenopausal)                       | 0.980 (0.628-1.530) | 0.930                                 | 0.850 (0.515-1.403) | 0.526                                   |
| Disease-free interval ( $\leq 2y$ vs. $> 2y$ )                             | 0.974 (0.619-1.535) | 0.911                                 | 0.780 (0.474-1.284) | 0.329                                   |
| Liver metastasis (no vs. yes)                                              | 1.017 (0.658-1.571) | 0.941                                 | 1.000 (0.632-1.583) | 0.999                                   |
| Lung metastasis (no vs. yes)                                               | 1.447 (0.953-2.197) | 0.083                                 | 1.270 (0.810-1.992) | 0.298                                   |
| Number of metastatic sites ( $< 2$ vs. $\geq 2$ )                          | 1.687 (0.953-2.983) | 0.072                                 | 1.640 (0.859-3.133) | 0.134                                   |
| Lines of advanced systematic therapy of palbociclib ( $< 3$ vs. $\geq 3$ ) | 1.346 (0.889-2.037) | 0.161                                 | 1.229 (0.803-1.881) | 0.342                                   |

Supplementary Table 4. Univariate and multivariate Cox regression analysis of factors associated with progression-free survival in the endocrine therapy group.

| Characteristic                                       | HR (95%CI)          | Univariate<br>Cox analysis<br>p-value | HR (95%CI)          | Multivariate<br>Cox analysis<br>p-value |
|------------------------------------------------------|---------------------|---------------------------------------|---------------------|-----------------------------------------|
| Age group ( $\geq 60$ vs. $< 60$ )                   | 2.150 (0.991-4.666) | 0.553                                 | 0.527 (0.218-1.272) | 0.154                                   |
| Menopausal status (postmenopausal vs. premenopausal) | 1.197 (0.810-1.770) | 0.367                                 | 0.939 (0.599-1.471) | 0.784                                   |
| Disease-free interval                                | 0.786 (0.370-1.667) | 0.530                                 | 0.846 (0.369-1.939) | 0.693                                   |

|                                                                   |                     |       |                     |       |
|-------------------------------------------------------------------|---------------------|-------|---------------------|-------|
| (≤2y vs. > 2y)                                                    |                     |       |                     |       |
| Liver metastasis (no vs. yes)                                     | 1.993 (0.986-4.028) | 0.055 | 1.246 (0.492-3.158) | 0.642 |
| Lung metastasis (no vs. yes)                                      | 1.291 (0.643-2.590) | 0.473 | 1.253 (0.591-2.655) | 0.556 |
| Number of metastatic sites (< 2 vs. ≥ 2)                          | 1.826 (0.788-4.230) | 0.160 | 1.438 (0.525-3.937) | 0.480 |
| Lines of advanced systematic therapy of palbociclib (< 3 vs. ≥ 3) | 1.455 (0.700-3.024) | 0.315 | 1.269 (0.579-2.783) | 0.552 |
